# Supplementary material for: Factors driving metabolic diversity in the budding yeast subphylum
Source: PubMed Central journal article supplement (PMC5833115; doi:10.1186/s12915-018-0498-3), 2018-03-02

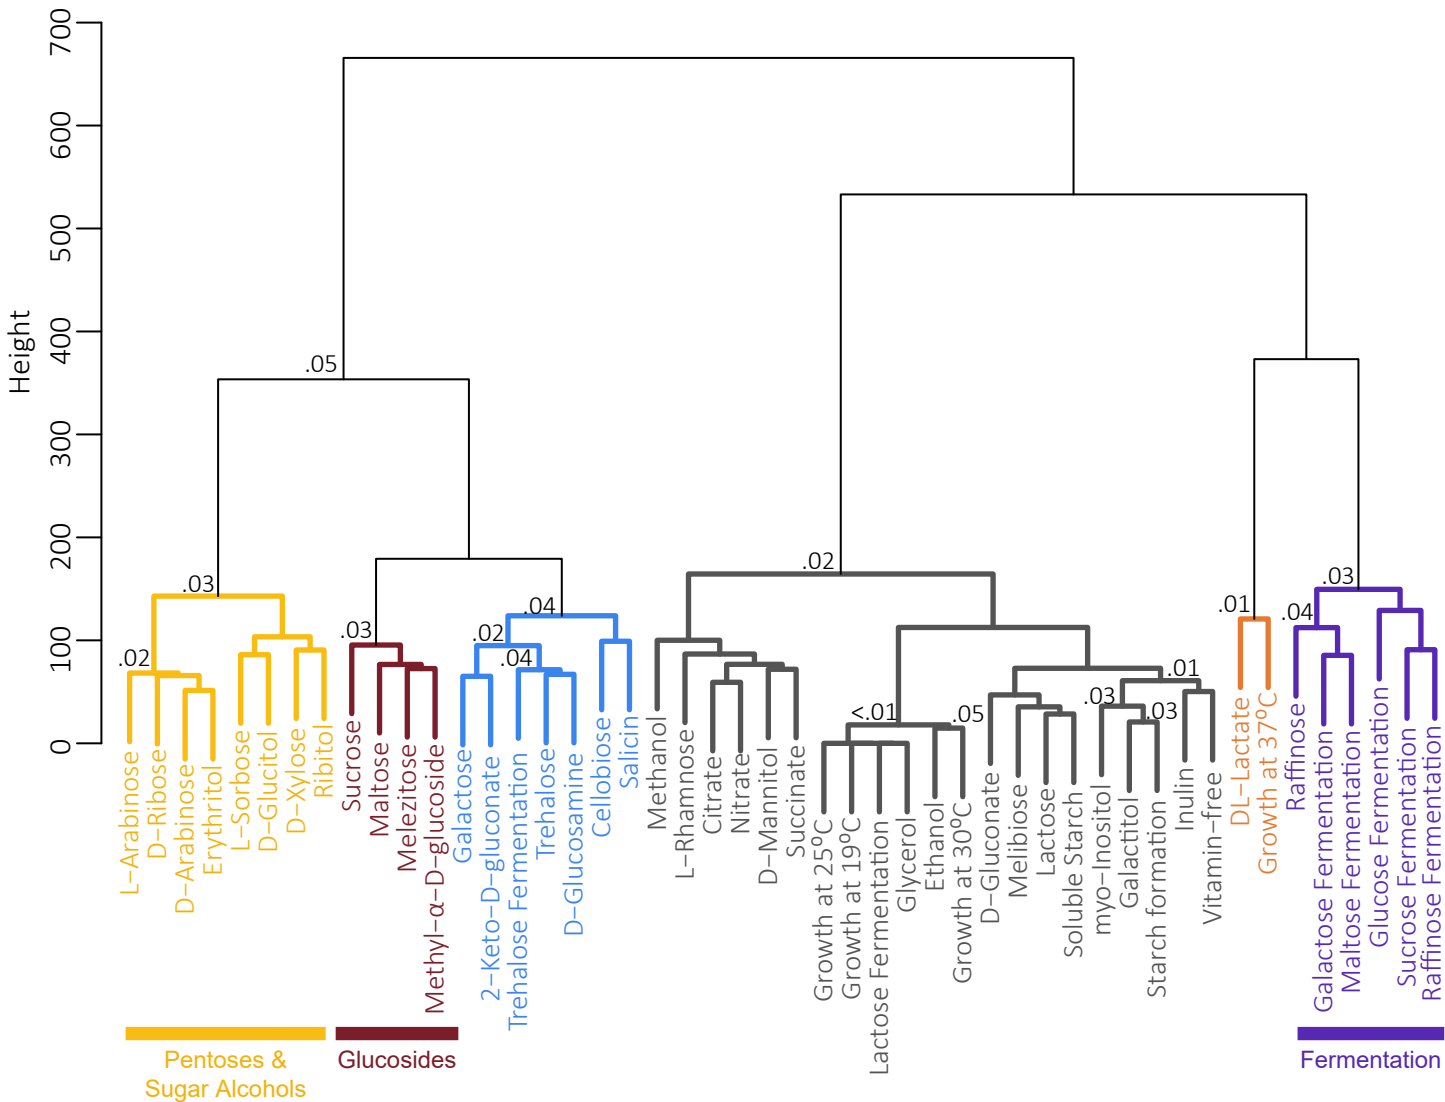

Supplement: 12915_2018_498_MOESM3_ESM.pdf [file 12915_2018_498_MOESM3_ESM.pdf]
